# Supplementary material
Source: Springer Nature journal article supplement (https://www.springermedizin.de/resource/supplementary/12885_2013_4349_MOESM3_ESM.pdf/9466054)
Supplement: MOESM3 [file 9466054]

Figure S1: Box plots of pAKT levels according to *PIK3CA* Mutation Status

A: pAKT-Ser473

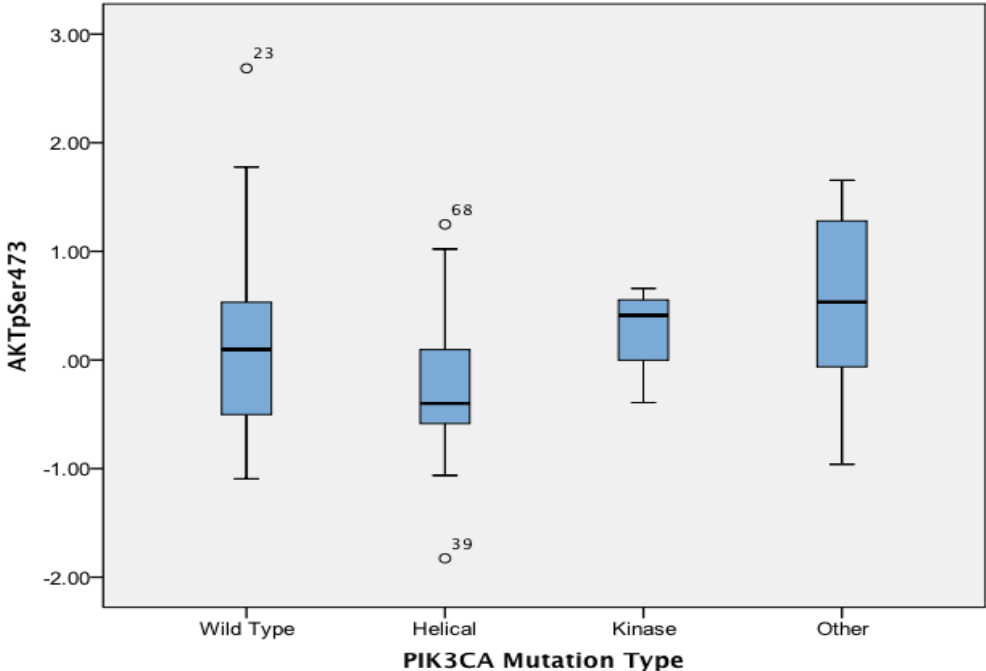

B: pAKT-Thr308

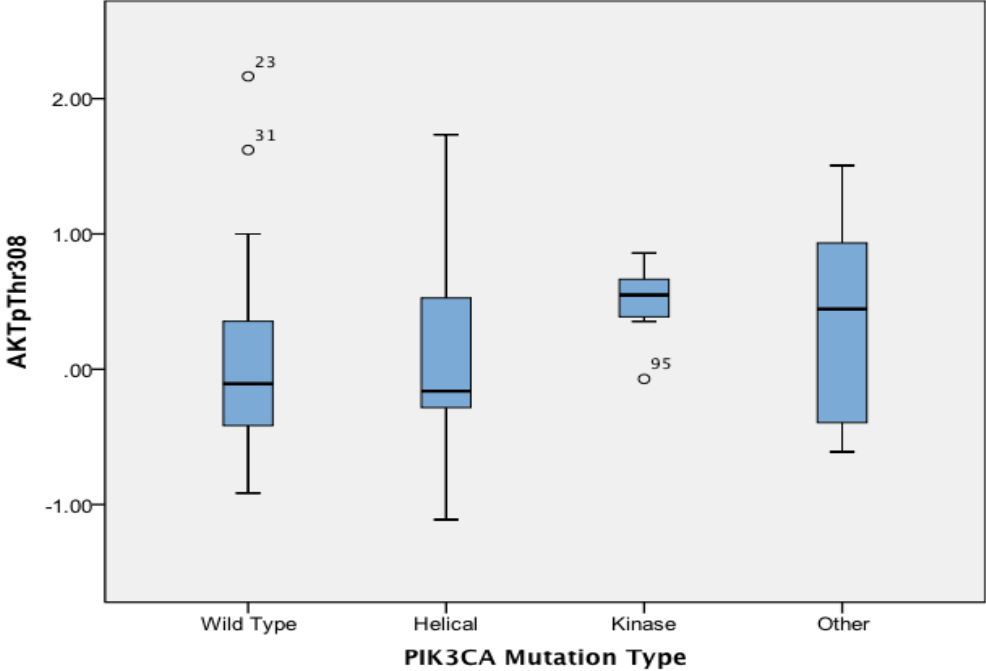

Note: Protein values indicated on Y-axis represent Log(2) relative protein expression as measured by RPPA. Changes in pAKT levels according to *PIK3CA* mutation category were not significantly different (compared to wild type).
